# Supplementary material for: Low-to-moderate arsenic exposure and urothelial tract cancers: A sixty-year latency analysis
Source: Research Square preprint supplement (doi:10.21203/rs.3.rs-1536386/v1), 2022-04-13
Supplement: Supplementary file 1 [file 5a2e2ad04a5d630b0d6f035a.docx]

Table 1. Descriptive statistics of arseniasis cohort in association with urothelial tract cancers (*ICD10* = C64–68)

|  | person-years |  | Incidence density | Univariate analysis | | |
| --- | --- | --- | --- | --- | --- | --- |
|  |  |  | (10-5/year) | HR (95% CI) | | |
| **Sociodemographic variables** | |  |  |  |  |  |
| Overall (n=5811) | 108683.65 | 85 | 78.21 |  |  |  |
| Age at recruitment |  |  |  |  |  |  |
| <58 | 63428.12 | 38 | 59.91 | 1.00 |  |  |
| 58 | 45255.53 | 47 | 103.85 | 1.919 | (1.237, | 2.977) |
| Sex |  |  |  |  |  |  |
| Female | 56006.77 | 42 | 74.99 | 1.00 |  |  |
| Male | 52676.88 | 43 | 81.63 | 1.11 | (0.718, | 1.708) |
| Marry Status |  |  |  |  |  |  |
| Married | 105968.97 | 84 | 79.27 | 1.00 |  |  |
| Single | 1888.49 | 1 | 52.95 | 0.723 | (0.101, | 5.188) |
| Education |  |  |  |  |  |  |
| Elementary and lower | 100234.16 | 80 | 79.81 | 1.00 |  |  |
| Junior high and higher | 8147.34 | 4 | 49.10 | 0.61 | (0.222, | 1.655) |
| Occupation |  |  |  |  |  |  |
| Soldiers/government employees | 1255.63 | 1 | 79.64 | 1.26 | (0.546, | 4.51) |
| Labor workers and business person | 15518.46 | 13 | 83.77 | 1.33 | (0.549, | 2.699) |
| Agriculture, and fisherman | 46068.25 | 42 | 91.17 | 1.45 | (0.859, | 2.336) |
| Housekeeping and others | 39675.00 | 25 | 63.01 | 1.00 |  |  |
| **Lifestyle Variables** | |  |  |  |  |  |
| Cigarette smoking |  |  |  |  |  |  |
| No | 66706.98 | 45 | 67.46 | 1.00 |  |  |
| Yes | 41976.68 | 40 | 95.29 | 1.45 | (0.94, | 2.243) |
| Alcohol drinking |  |  |  |  |  |  |
| No | 88977.83 | 70 | 78.67 | 1.00 |  |  |
| Yes | 19573.7 | 15 | 76.63 | 0.98 | (0.551, | 1.742) |
| Tea |  |  |  |  |  |  |
| No | 82541.27 | 62 | 75.11 | 1.00 |  |  |
| Yes | 25842.75 | 23 | 88.99 | 1.24 | (0.766, | 2.007) |
| Exercise |  |  |  |  |  |  |
| No | 84732.74 | 62 | 73.17 | 1.00 |  |  |
| Yes | 23614.93 | 23 | 97.40 | 1.304 | (0.794, | 2.143) |

Table 2. Association of arsenic exposure metrics among study groups

|  | Non-cancer controls (n=5726) | | | Bladder cancer cases (ICD10=67) (n=49) | | | Upper urothelial tract cancers (ICD10=64~66, 68) (n=36) | | | ANOVA** |
| --- | --- | --- | --- | --- | --- | --- | --- | --- | --- | --- |
|  | Means | SD |  | Means | SD | HR | Median | SD | HR | p-value |
| **Arsenic Exposure** | |  |  |  |  |  |  |  |  |  |
| Concentration in well water (ppb) | 133.28 | 302.24 |  | 350.45 | 696.36 | 1.00* | 346.23 | 643.20 | 1.00* | <.0001ab |
| Years of exposure | 41.54 | 16.13 |  | 44.33 | 15.10 | 1.02 | 41.14 | 14.76 | 1.00 | 0.585 |
| Cumulative arsenic exposure  (ppm-years) | 4.44 | 10.58 |  | 10.08 | 17.35 | 1.02 | 13.11 | 24.19 | 1.03* | <.0001ab |
| **Urinary Inorganic Arsenic Metabolites** | | | | |  |  |  |  |  |  |
| Total (ppb) | 99.10 | 130.43 |  | 192.48 | 244.32 | 1.00* | 95.95 | 76.45 | 1.00 | 0.078 |
| Inorganic arsenic (ppb) | 9.32 | 13.11 |  | 27.94 | 65.29 | 1.02* | 13.16 | 17.77 | 1.01 | 0.064 |
| MMA (ppb) | 10.72 | 18.64 |  | 17.77 | 26.68 | 1.01 | 11.45 | 13.68 | 1.00 | 0.508 |
| DMA | 79.07 | 110.51 |  | 146.77 | 174.49 | 1.00* | 71.34 | 56.83 | 1.00 | 0.098 |
| Asi% | 11.90 | 9.74 |  | 12.58 | 8.71 | 1.01 | 15.44 | 14.34 | 1.02 | 0.598 |
| MMA% | 9.94 | 6.66 |  | 9.09 | 5.90 | 0.98 | 10.61 | 7.76 | 1.01 | 0.577 |
| DMA% | 78.15 | 11.60 |  | 78.33 | 11.10 | 1.00 | 73.95 | 14.50 | 0.98 | 0.200 |
| PMI | 1.95 | 7.17 |  | 1.55 | 2.86 | 0.98 | 4.50 | 15.63 | 1.01 | 0.633 |
| SMI | 14.80 | 62.39 |  | 19.41 | 36.65 | 1.00 | 10.71 | 6.57 | 0.99 | 0.506 |
| **P* < 0.05, performed by univariate Cox regression model  **Logarithmic transformation before ANOVA and Scheffe’s multiple comparison procedure  aStatistical significance when comparing bladder cancer cases and noncancer controls  bStatistical significance when comparing upper urothelial tract cancer cases and noncancer controls  cStatistical significance when comparing upper urothelial tract cancer cases and bladder cancer cases | | | | | | | | | | |

Table 3. Multiple Cox regression analyses for arsenic exposure metrics and urothelial tract cancers

| Bladder cancer (ICD10=C67) | | | | | | | | | |  | Upper urothelial tract cancers (ICD10=C64~66, 68) | | | | | | | | | |
| --- | --- | --- | --- | --- | --- | --- | --- | --- | --- | --- | --- | --- | --- | --- | --- | --- | --- | --- | --- | --- |
|  | Model I | | | Model II | | | Model III | | |  | Model I | | | Model II | | | Model III | | |
|  | HR* | (95% CI) | | HR* | (95% CI) | | HR* | (95% CI) | |  | HR* | (95% CI) | | HR* | (95% CI) | | HR* | (95% CI) | |
| Arsenic exposure  Concentration in well water (ppb) | | | | |  |  |  |  |  |  |  |  |  |  |  |  |  |  |  |
| 10.00 | 1* | - | - |  |  |  |  |  |  |  | 1* | - | - |  |  |  |  |  |  |
| 10.01~50.00 | 1.86 | (0.49 | ,7.04) |  |  |  |  |  |  |  | 0.40 | (0.10 | ,1.68) |  |  |  |  |  |  |
| 50.01~100.00 | 1.61 | (0.27 | ,9.67) |  |  |  |  |  |  |  | 2.08 | (0.60 | ,7.26) |  |  |  |  |  |  |
| >100.00 | 4.88 | (1.35 | ,17.61) |  |  |  |  |  |  |  | 1.63 | (0.51 | ,5.20) |  |  |  |  |  |  |
| Cumulative arsenic exposure (ppm-years; in tertile) | | | |  |  |  |  |  |  |  |  |  |  |  |  |  |  |  |  |
| 0.555 | | | | 1* | - | - |  |  |  |  |  |  |  | 1 | - | - |  |  |  |
| 0.555~2.548 | | | | 5.06 | (1.09 | ,23.49) |  |  |  |  |  |  |  | 0.50 | (0.13 | ,1.93) |  |  |  |
| >2.548 | | | | 10.22 | (2.30 | ,45.47) |  |  |  |  |  |  |  | 2.13 | (0.80 | ,5.64) |  |  |  |
| Urinary inorganic arsenic metabolites (ppb) | | | | |  |  |  |  |  |  |  |  |  |  |  |  |  |  |  |
| 46.832 | | | |  |  |  | 1* | - | - |  |  |  |  |  |  |  | 1 | - | - |
| 46.832~95.342 | | | |  |  |  | 2.64 | (0.80 | ,8.75) |  |  |  |  |  |  |  | 7.55 | (1.65 | ,34.53) |
| >95.342 | | |  |  |  |  | 3.79 | (1.15 | ,12.47) |  |  |  |  |  |  |  | 4.28 | (0.83 | ,22.11) |
| Arsenic methylation capacity | | | |  |  |  |  |  |  |  |  |  |  |  |  |  |  |  |  |
| PMI(median low/high) | | | |  |  |  |  |  |  |  |  |  |  |  |  |  |  |  |  |
| High | 1 | - | - | 1 | - | - | 1 | - | - |  | 1 | - | - | 1 | - | - | 1 | - | - |
| Low | 0.60 | (0.26 | ,1.39) | 0.61 | (0.26 | ,1.43) | 0.45 | (0.19 | ,1.09) |  | 0.57 | (0.23 | ,1.43) | 0.56 | (0.22 | ,1.40) | 0.48 | 0.18 | ,1.24) |
| SMI(median low/high) | | | |  |  |  |  |  |  |  |  |  |  |  |  |  |  |  |  |
| High | 1 | - | - | 1 | - | - | 1 | - | - |  | 1 | - | - | 1 | - | - | 1 | - | - |
| Low | 1.18 | (0.46 | ,3.02) | 1.14 | (0.44 | ,2.92) | 1.00 | (0.39 | ,2.59) |  | 0.75 | (0.28 | ,1.97) | 0.75 | (0.29 | ,1.98) | 0.61 | 0.23 | ,1.63) |
| **P* < 0.05, test for monotonic trend performed by multiple Cox regression analysis adjusted by age, sex, marital status, education, occupation, cigarette smoking, and alcohol drinking | | | | | | | | | | | | | | | | | | | | |
